# Supplementary material for: Predictors of Positive Surgical Margins after Robot-Assisted Partial Nephrectomy for Localized Renal Tumors: Insights from a Large Multicenter International Prospective Observational Project (The Surface-Intermediate-Base Margin Score Consortium)
Source: MDPI journal article supplement (doi:10.3390/jcm11071765), 2022-03-23
Supplement: s1 [file s1]

**Supplementary Table S1:** Analysis of the patterns of resection techniques according to different tumor histotypes, stratified by margin status.

|                                                |       | Positive Surgical Margins |            |
|------------------------------------------------|-------|---------------------------|------------|
|                                                |       | No (n=271)                | Yes (n=18) |
| <b>Enucleation</b> (SIB 0-2) (n=154) (n,%)     | ccRCC | 76 (51.7)                 | 4 (57.1)   |
|                                                | pRCC  | 17 (11.6)                 | 0 (0)      |
|                                                | chRCC | 11 (7.5)                  | 1 (14.3)   |
|                                                | Onco  | 26 (17.7)                 | 1 (14.3)   |
|                                                | AML   | 9 (6.1)                   | 1 (14.3)   |
|                                                | Other | 8 (5.4)                   | 0 (0)      |
| <b>Enucleoresection</b> (SIB 3-4) (n=79) (n,%) | ccRCC | 34 (48.6)                 | 6 (66.7)   |
|                                                | pRCC  | 11 (15.7)                 | 3 (33.3)   |
|                                                | chRCC | 5 (7.1)                   | 0 (0)      |
|                                                | Onco  | 12 (17.1)                 | 0 (0)      |
|                                                | AML   | 6 (8.6)                   | 0 (0)      |
|                                                | Other | 2 (2.9)                   | 0 (0)      |
| <b>Resection</b> (SIB 5) (n=56) (n,%)          | ccRCC | 27 (50.0)                 | 2 (100)    |
|                                                | pRCC  | 3 (5.6)                   | 0 (0)      |
|                                                | chRCC | 5 (9.3)                   | 0 (0)      |
|                                                | Onco  | 7 (13.0)                  | 0 (0)      |
|                                                | AML   | 10 (18.5)                 | 0 (0)      |
|                                                | Other | 2 (3.7)                   | 0 (0)      |
